# Supplementary material
Source: PubMed Central journal article supplement (PMC4624196)
Supplement: NIHMS685915-supplement-Supplemental_files.pdf [file NIHMS685915-supplement-Supplemental_files.pdf]

### Normal interneuron connectivity

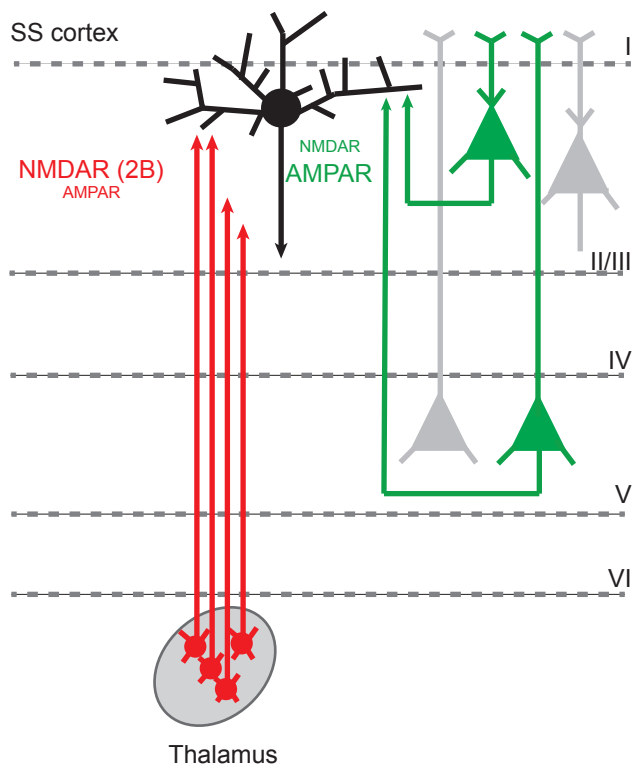

### Aberrant interneuron connectivity

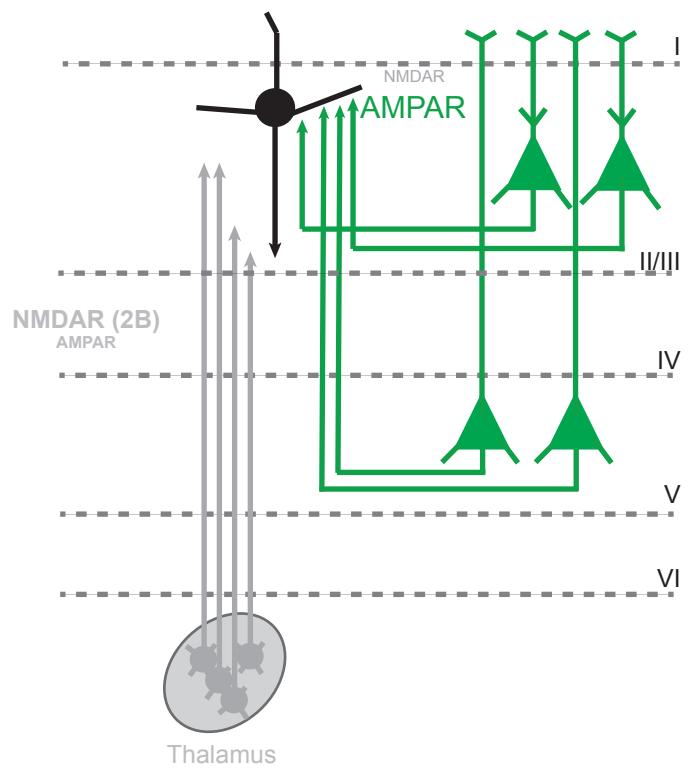

Supplementary Figure 1

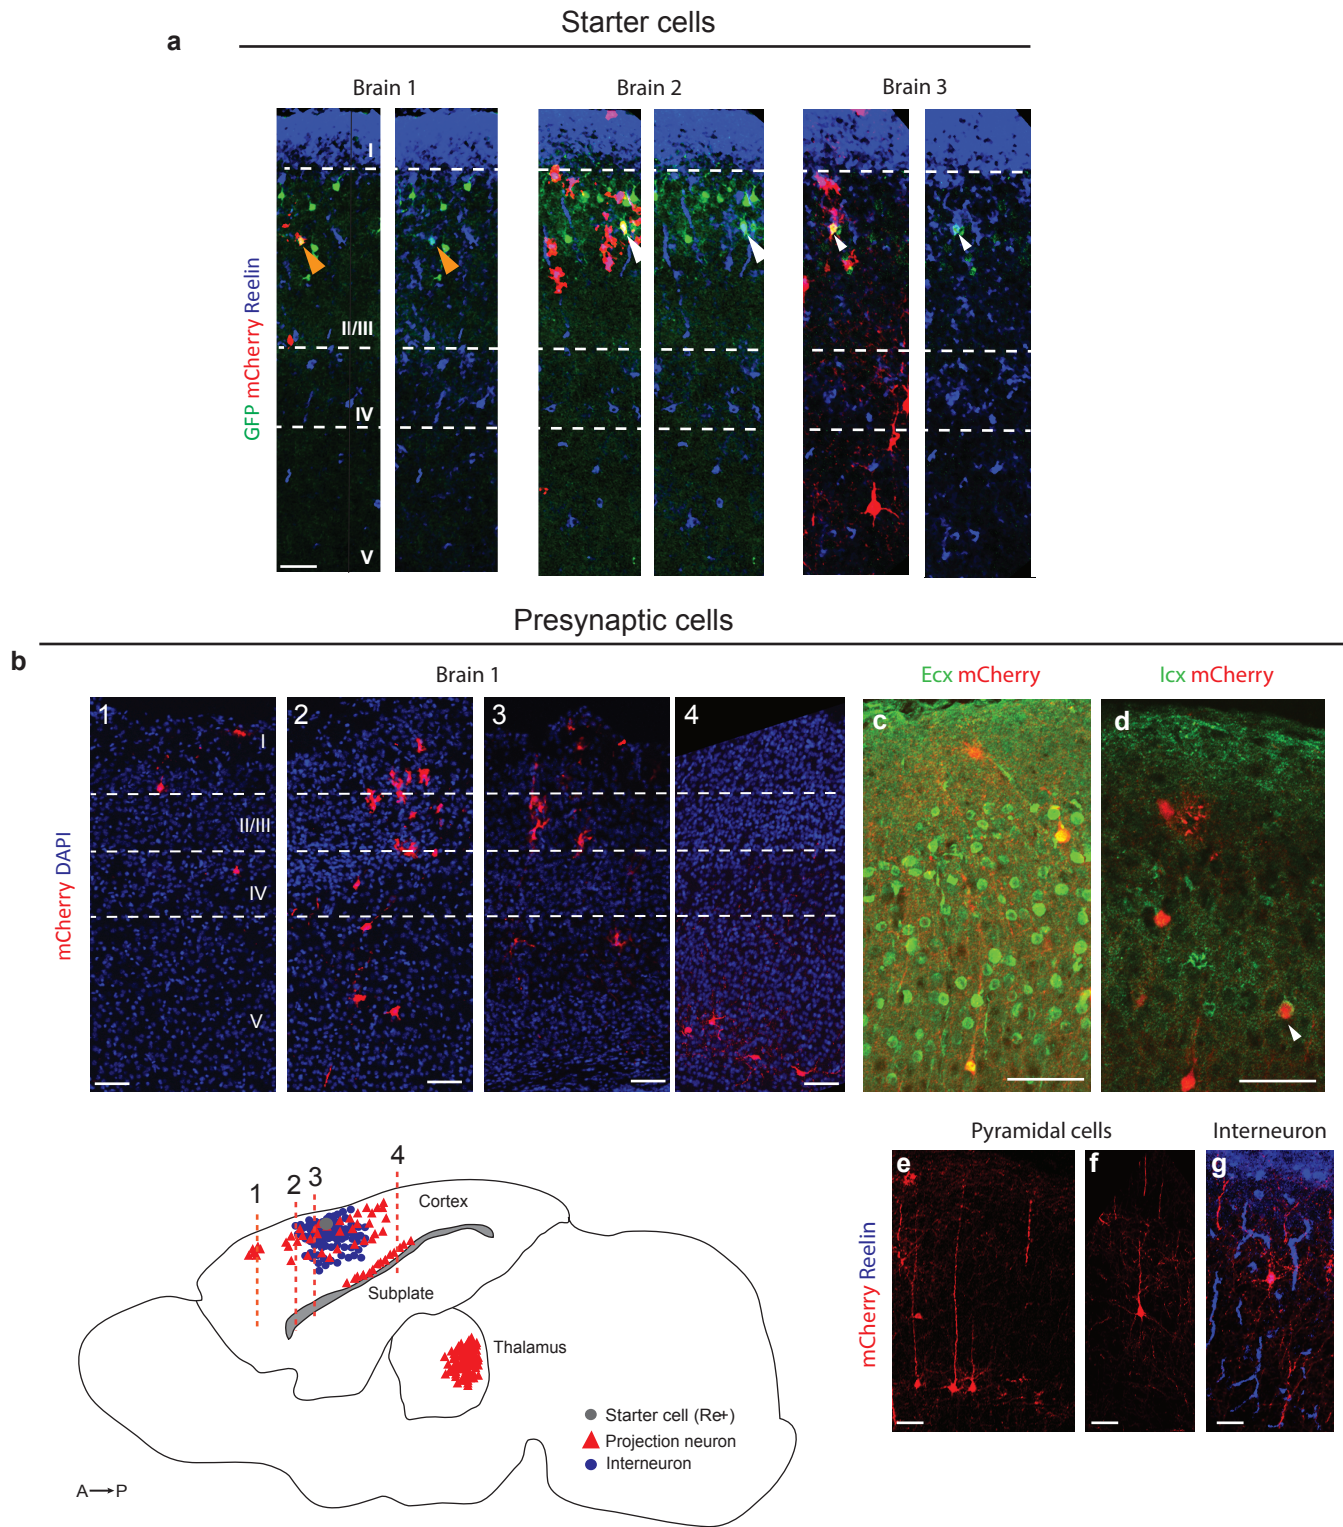

Supplementary Figure 2

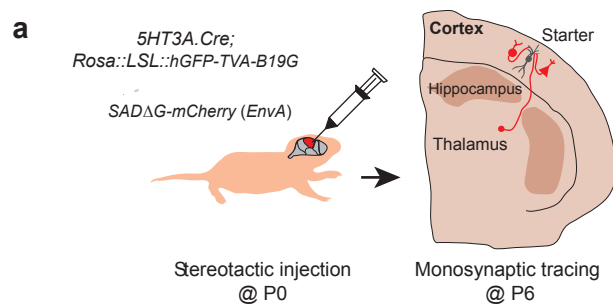

**b**

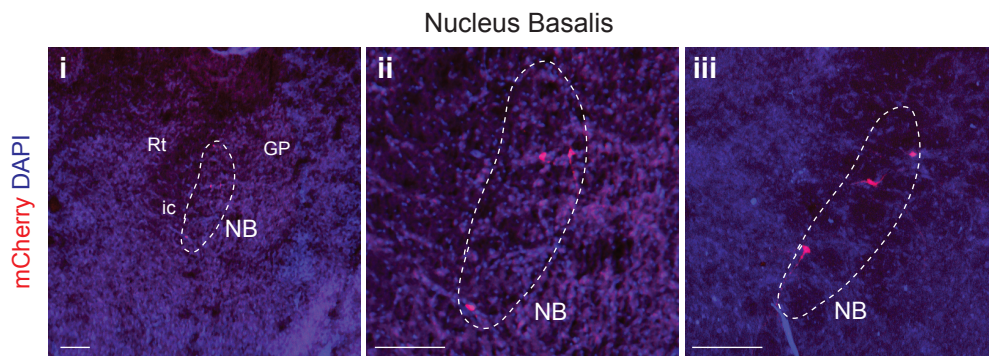

Supplementary Figure 3

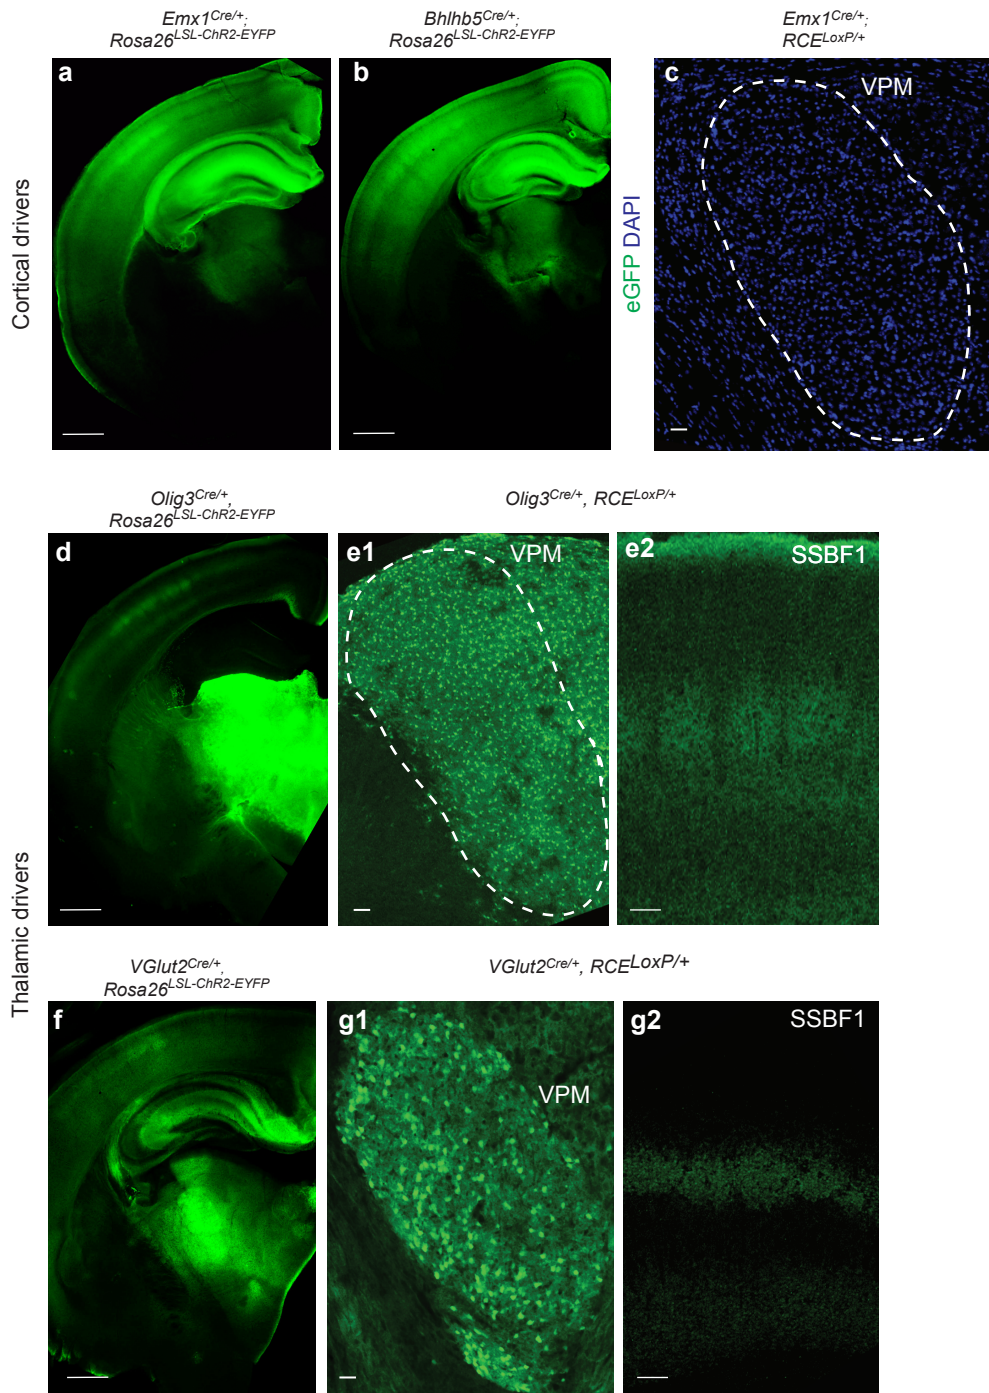

Supplementary Figure 4

*Olig3<sup>Cre/+</sup>*  
*Rosa26<sup>LSL-ChR2-EYFP</sup>*

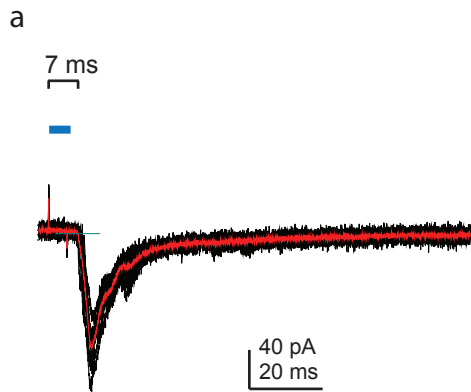

*VGlut2<sup>Cre/+</sup>*  
*Rosa26<sup>LSL-ChR2-EYFP</sup>*

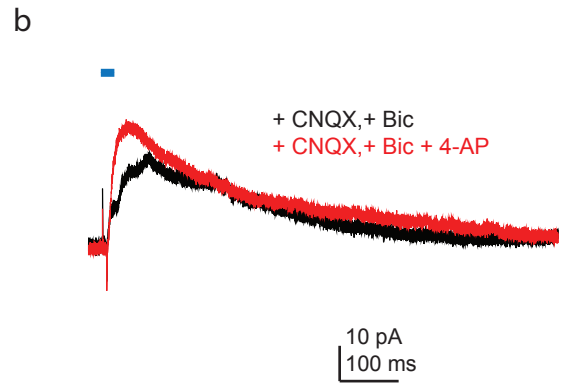

c

*VGlut2<sup>Cre/+</sup>*  
*Rosa26<sup>LSL-ChR2-EYFP</sup>*

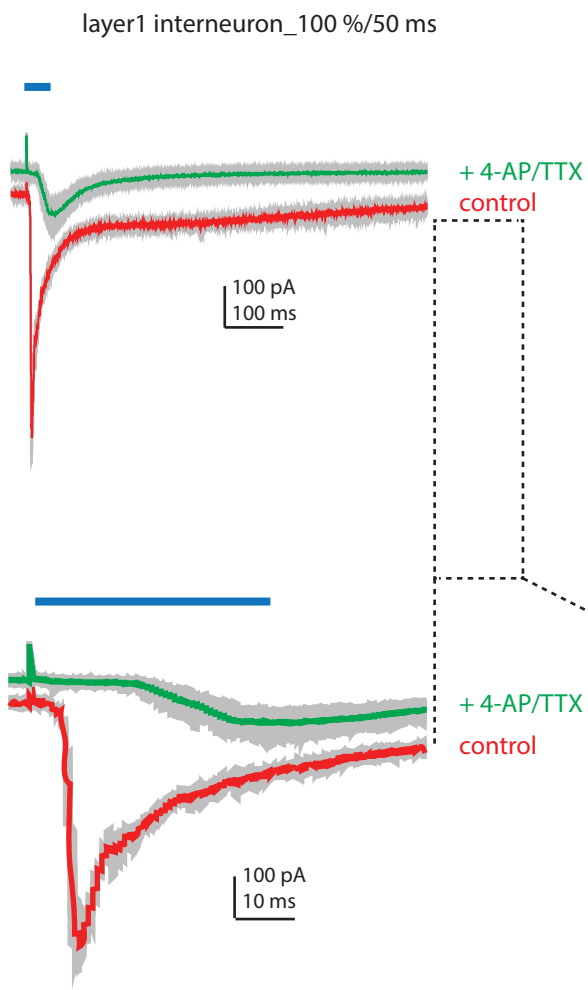

d

VGlut2Cre-AAVflexCh2R thalamic injection

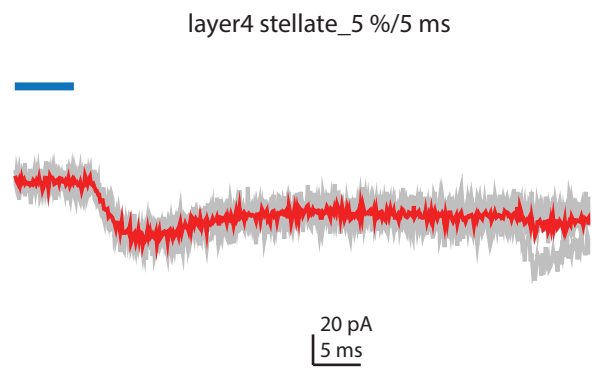

Supplementary Figure 5

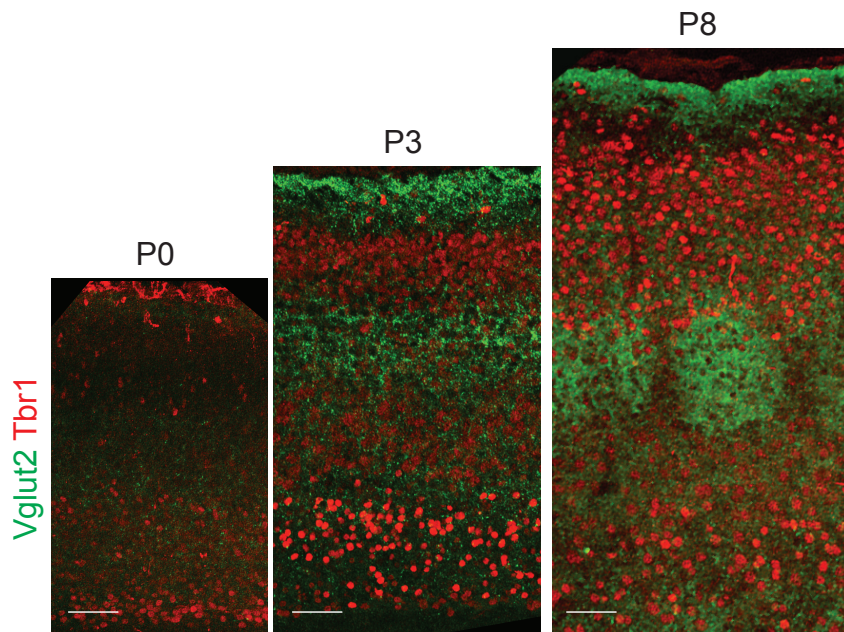

Supplementary Figure 6

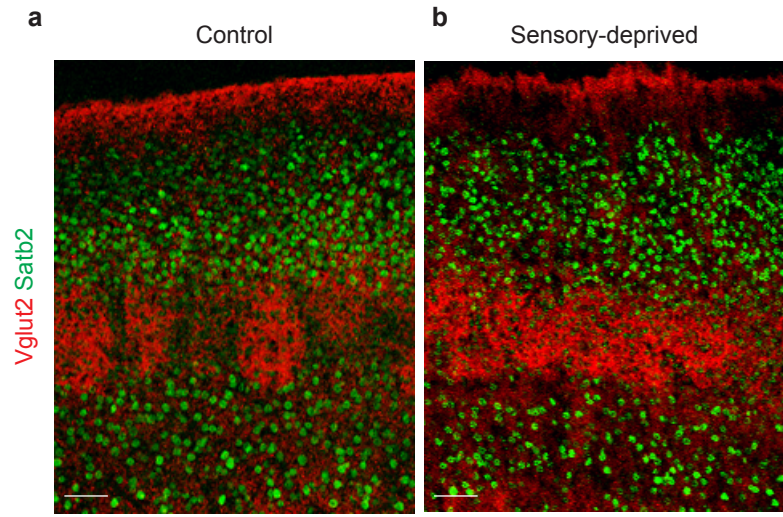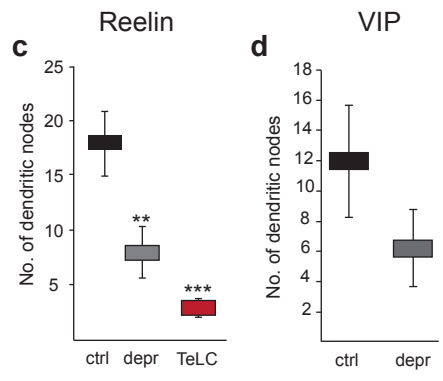

**Supplementary Figure 7**

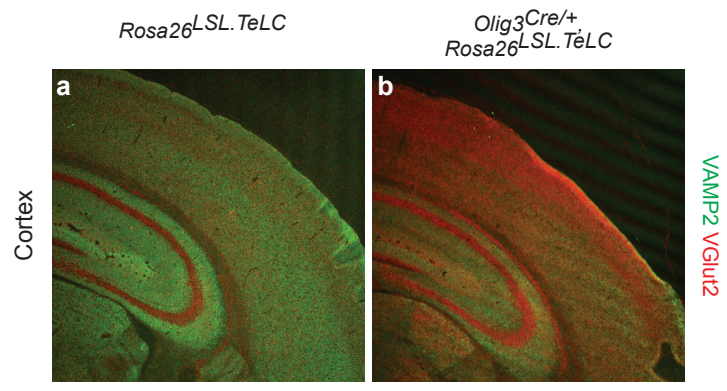

**Supplementary Figure 8**



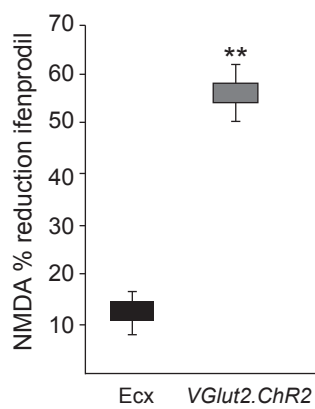

**Supplementary Figure 9**

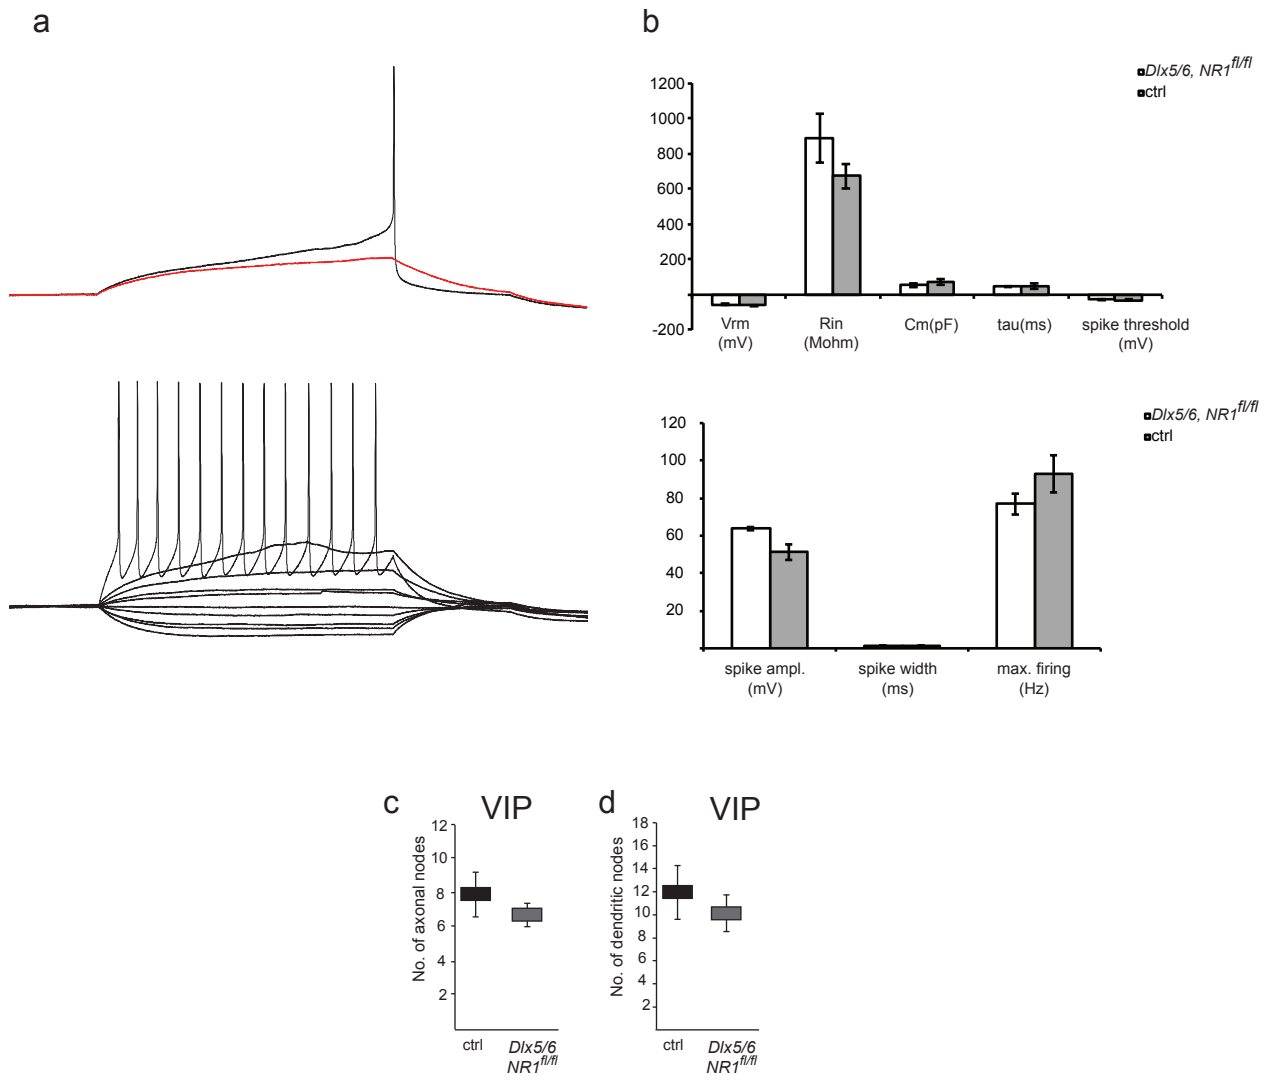

**Supplementary Figure 10**

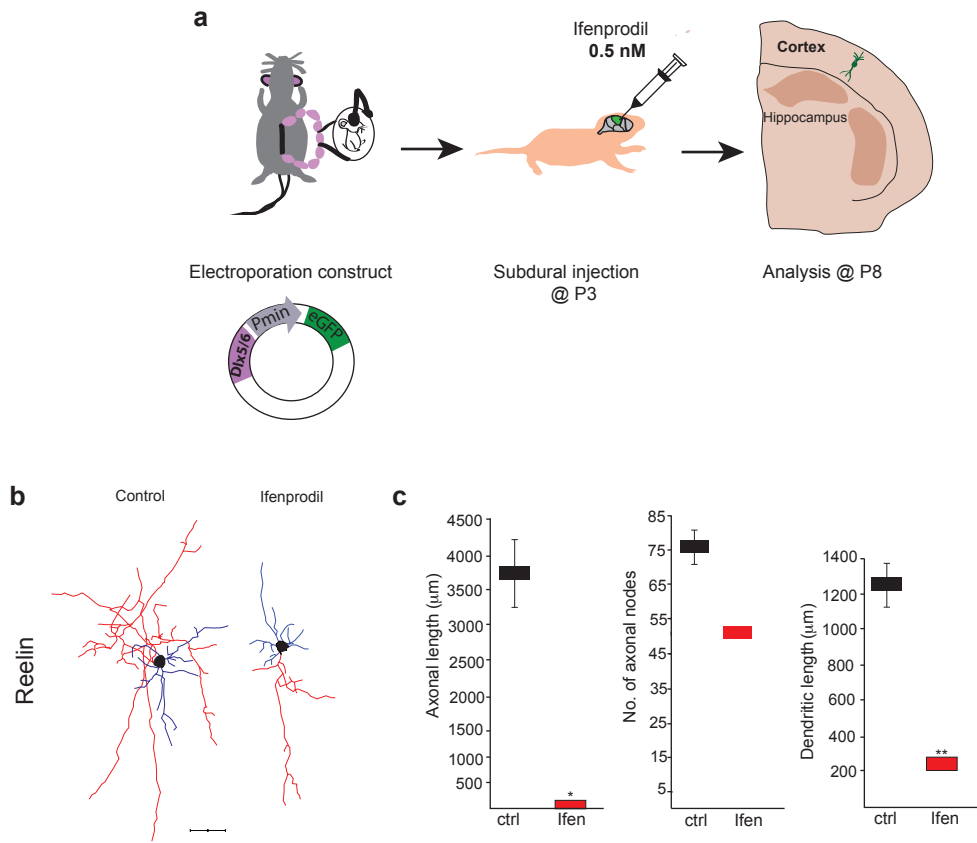

Supplementary Figure 11

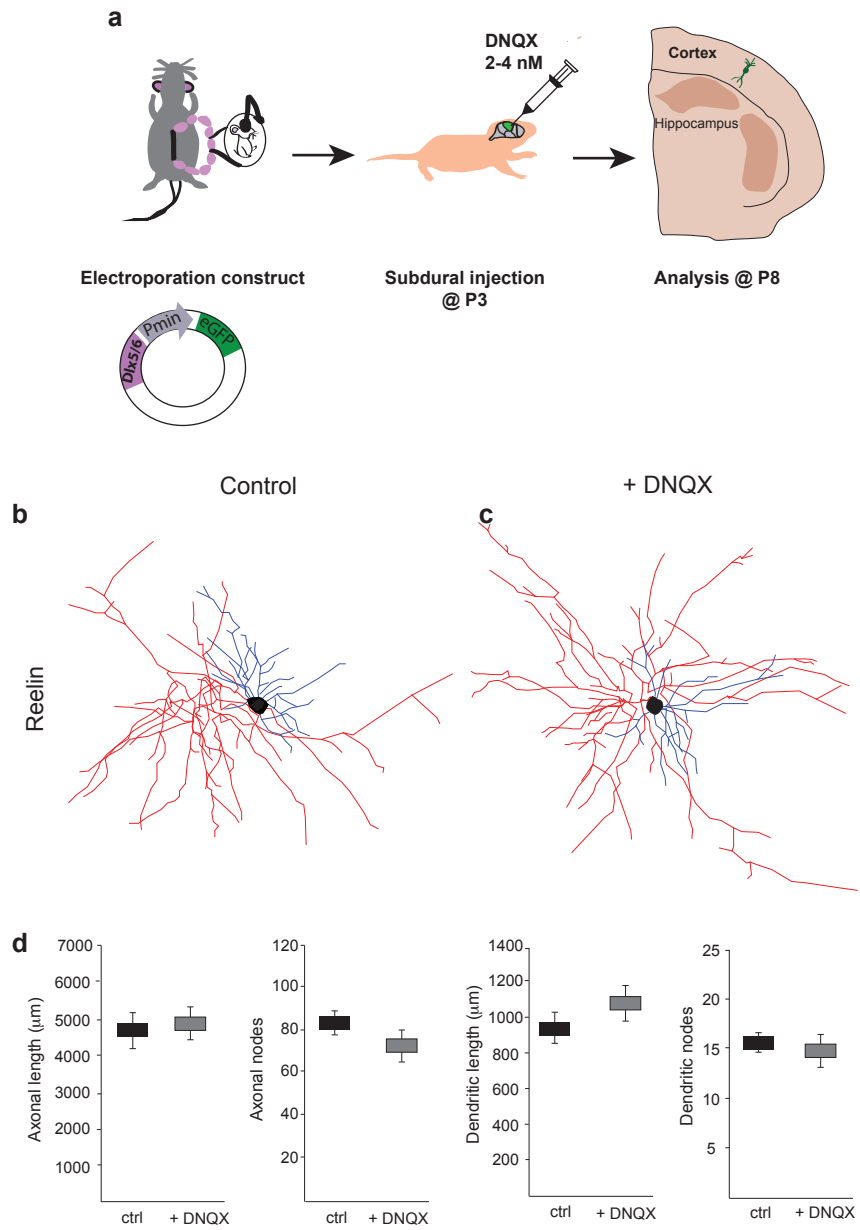

Supplementary Figure 12

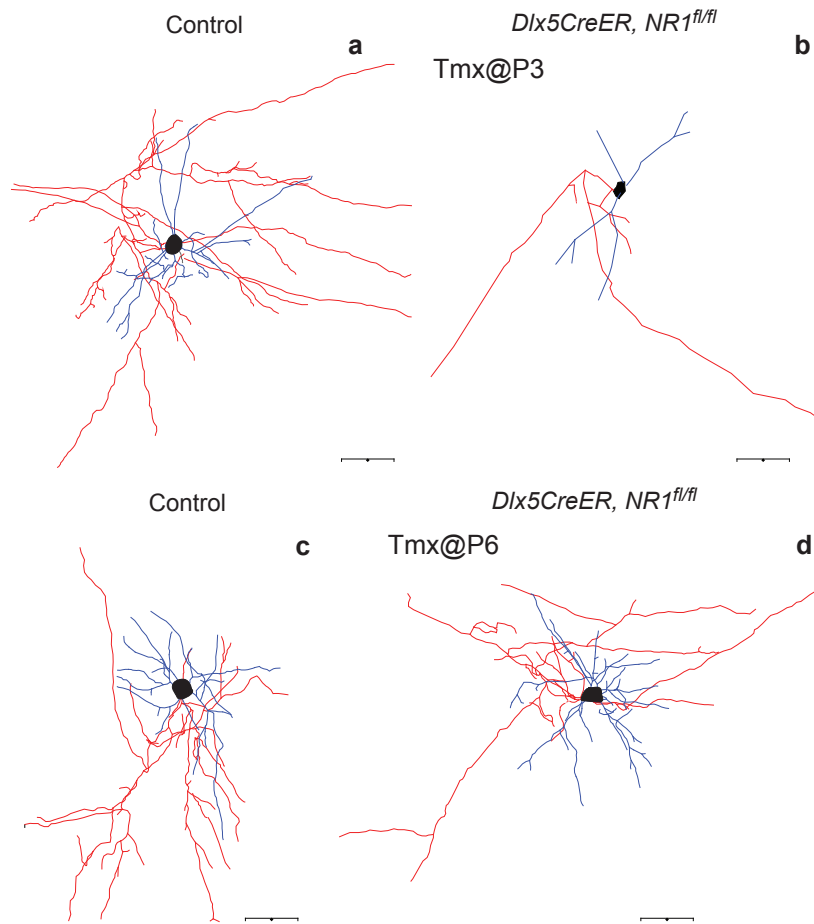

**Supplementary Figure 13**
